# Supplementary material
Source: PubMed Central journal article supplement (PMC8930700)
Supplement: NIHMS1778120-supplement-1.pdf [file NIHMS1778120-supplement-1.pdf]

## **Supplemental materials**

**Title:** Abnormal anatomical and functional connectivity of the thalamo-sensorimotor circuit in chronic low back pain: resting-state fMRI and diffusion tensor imaging study

Cui Ping Mao<sup>1</sup>, Georgia Wilson<sup>1</sup>, Jin Cao<sup>1</sup>, Nathaniel Meshberg<sup>1</sup>, Yiting Huang, Jian Kong<sup>1</sup>

Department of Psychiatry, Massachusetts General Hospital and Harvard Medical School,

Charlestown, MA, USA 02129

## **The Inclusion/Exclusion criteria of chronic low back pain**

### **Inclusion Criteria**

- a) Volunteers 18-60 years of age.
- b) Meet the Classification Criteria of chronic low back pain (having low back pain for more than 3 months).
- c) At least 4/10 clinical pain on a 0-10 continuous visual analogue scale (VAS) before the MRI scan.
- d) Participants have had a prior evaluation of their low back pain by a health care provider, which may have included radiographic studies. Documentation of this evaluation will be sought from Partners or outside medical records and kept in the subject's research record.
- e) At least a 10th grade English-reading level; English can be a second language, provided that the patients feel they understand all the questions used in the assessment measures.

### **Exclusion Criteria**

- a) Specific causes of back pain (e.g. cancer, fractures, spinal stenosis, infections).
- b) Complicated back problems (e.g. prior back surgery, medicolegal issues).
- c) Conditions making study participation difficult (e.g. paralysis, psychoses, or other severe psychological problems as per the judgment of a study investigator during Session 1).
- d) The intent to undergo surgery during the time of involvement in the study.
- e) History of cardiac, respiratory, or nervous system disease that, in the investigator's judgment, precludes participation in the study because of a heightened potential for adverse outcome. For example: asthma or claustrophobia.
- f) Presence of any contraindications to MRI scanning. For example: cardiac pacemaker, metal

implants, fear of closed spaces, pregnancy.

g) Unresolved medical legal/disability/workers compensation claims in connection with low back pain.

h) Radicular pain extending below the knee.

i) Use of prescription opioids or steroids for pain.

j) Active substance abuse disorder in the past 24 months, as determined by self-report and/or urine toxicology.

**Supplemental Table 1 Brain areas included in 6 cortical regions of interest.**

| Cortical ROI             | Regions included                                         | Label |
|--------------------------|----------------------------------------------------------|-------|
| Prefrontal cortex        | Frontal Pole                                             | 1     |
|                          | Superior Frontal Gyrus                                   | 3     |
|                          | Middle Frontal Gyrus                                     | 4     |
|                          | Inferior Frontal Gyrus (pars triangularis)               | 5     |
|                          | Inferior Frontal Gyrus (pars opercularis)                | 6     |
|                          | Frontal Medial Cortex                                    | 25    |
|                          | Subcallosal Cortex                                       | 27    |
|                          | Paracingulate Gyrus                                      | 28    |
|                          | Cingulate Gyrus (Anterior division)                      | 29    |
|                          | Frontal Orbital Cortex                                   | 33    |
|                          | Frontal Operculum Cortex                                 | 41    |
| Central Operculum Cortex | 42                                                       |       |
| Motor Cortex             | Precentral Gyrus                                         | 7     |
|                          | Juxtapositional Lobule Cortex (Supplementary Motor Area) | 26    |
| Somatosensory Cortex     | Postcentral Gyrus                                        | 17    |
| Parietal Cortex          | Superior Parietal Lobule                                 | 18    |
|                          | Supramarginal Gyrus (anterior division)                  | 19    |
|                          | Supramarginal Gyrus (posterior division)                 | 20    |
|                          | Angular Gyrus                                            | 21    |
|                          | Precuneous Cortex                                        | 31    |

---

|                  |                                                  |    |
|------------------|--------------------------------------------------|----|
|                  | Parietal Operculum Cortex                        | 43 |
| Temporal Cortex  | Temporal Pole                                    | 8  |
|                  | Superior Temporal Gyrus (anterior division)      | 9  |
|                  | Superior Temporal Gyrus (posterior division)     | 10 |
|                  | Middle Temporal Gyrus (anterior division)        | 11 |
|                  | Middle Temporal Gyrus (posterior division)       | 12 |
|                  | Middle Temporal Gyrus (Temporo-occipital part)   | 13 |
|                  | Inferior Temporal Gyrus (anterior division)      | 14 |
|                  | Inferior Temporal Gyrus (posterior division)     | 15 |
|                  | Inferior Temporal Gyrus (Temporo-occipital part) | 16 |
|                  | Parahippocampal Gyrus (anterior division)        | 34 |
|                  | Parahippocampal Gyrus (posterior division)       | 35 |
|                  | Temporal Fusiform Cortex (anterior division)     | 37 |
|                  | Temporal Fusiform Cortex (posterior division)    | 38 |
|                  | Temporal Occipital Fusiform Cortex               | 39 |
|                  | Planum Polare                                    | 44 |
|                  | Planum Temporale                                 | 46 |
| Occipital Cortex | Lateral Occipital Gyrus (Superior division)      | 22 |
|                  | Lateral Occipital Gyrus (Inferior division)      | 23 |
|                  | Intracalcarine Cortex                            | 24 |
|                  | Cuneal cortex                                    | 32 |
|                  | Lingual Gyrus                                    | 36 |

---

---

|                          |    |
|--------------------------|----|
| Occipital Fusiform Gyrus | 40 |
| Supracalcarine Cortex    | 47 |
| Occipital Pole           | 48 |

---

ROI, region of interest.

**Supplemental Table 2 Anatomical connectivity of the thalamocortical pathways revealed by probabilistic tractography.**

| Cortical region   | Hemisphere | Group                    |             | <i>P</i> value |
|-------------------|------------|--------------------------|-------------|----------------|
|                   |            | HC                       | CLBP        |                |
| Prefrontal cortex | Left       | 0.32 ± 0.05 <sup>a</sup> | 0.31 ± 0.06 | 0.204          |
| Prefrontal cortex | Right      | 0.37 ± 0.06              | 0.38 ± 0.06 | 0.887          |
| Parietal cortex   | Left       | 0.12 ± 0.03              | 0.12 ± 0.04 | 0.516          |
| Parietal cortex   | Right      | 0.12 ± 0.03              | 0.12 ± 0.03 | 0.345          |
| Temporal cortex   | Left       | 0.17 ± 0.05              | 0.17 ± 0.05 | 0.792          |
| Temporal cortex   | Right      | 0.15 ± 0.04              | 0.16 ± 0.05 | 0.811          |
| Occipital cortex  | Left       | 0.16 ± 0.04              | 0.15 ± 0.04 | 0.11           |
| Occipital cortex  | Right      | 0.14 ± 0.03              | 0.14 ± 0.03 | 0.347          |

HC, healthy control; CLBP, chronic low back pain; <sup>a</sup>: mean ± standard deviation.

**Supplemental Table 3 Correlation between anatomical/functional connectivity of the thalamus and clinical measures in patients with chronic low back pain**

| Clinical measures                   | Hemisphere | RsFC          |           |                       |           | Anatomical connectivity |           |
|-------------------------------------|------------|---------------|-----------|-----------------------|-----------|-------------------------|-----------|
|                                     |            | Thalamo-motor |           | Thalamo-somatosensory |           | Thalamo-motor           |           |
|                                     |            | <i>R1</i>     | <i>P1</i> | <i>R2</i>             | <i>P2</i> | <i>R3</i>               | <i>P3</i> |
| BDI scores                          | Left       | 0.177         | 0.2       | 0.223                 | 0.106     | -0.141                  | 0.308     |
|                                     | Right      | 0.181         | 0.191     | 0.164                 | 0.237     | NA                      | NA        |
| Pain intensity<br>(past week)       | Left       | 0.24          | 0.219     | 0.12                  | 0.563     | 0.1                     | 0.71      |
|                                     | Right      | 0.193         | 0.431     | 0.15                  | 0.399     | NA                      | NA        |
| Pain intensity<br>(during MRI scan) | Left       | 0.2           | 0.219     | 0.17                  | 0.563     | 0.05                    | 0.74      |
|                                     | Right      | 0.15          | 0.431     | 0.32                  | 0.036*    | NA                      | NA        |
| Pain duration                       | Left       | -0.186        | 0.12      | 0.093                 | 0.441     | 0.19                    | 0.59      |
|                                     | Right      | 0.143         | 0.235     | 0.014                 | 0.091     | NA                      | NA        |

RsFC, resting-state functional connectivity; BDI, Beck Depression Inventory II; MRI, magnetic resonance imaging; NA, not available. R1, R2 and R3 represent the correlation coefficients between the thalamic connectivity and clinical measures in patients with chronic low back pain.
